# Supplementary material for: Antitumor Effect of Programmed Death-1 (PD-1) Blockade in Humanized the NOG-MHC Double Knockout Mouse
Source: Oxford University Press journal article supplement (doi:10.1158/1078-0432.ccr-16-0122), 2016-07-25
Supplement: 10780432ccr160122-sup-160983_2_supp_3547401_j91j6h.docx [file 10780432ccr160122-sup-160983_2_supp_3547401_j91j6h.docx]

**Supplementary Table 1.** Engraftment of human PBMCs in NOG-dKO mice

after transplantation

| Markers 2 weeks 4 weeks 8 weeks |
| --- |

Spleen cell count (x107) 1.5 5.4 2.9

Human CD45+/spleen (%) 50.6 59.4 46.7

CD19+/CD45+ cells (%) 32.5 34.0 2.4

CD19+ #/spleen (x105) 24.6 127.6 2.3

CD138+/CD19+ cells (%) 32.4 55.7 74.7

CD138+ #/spleen (x105) 8.1 62.9 1.7

CD3+/CD45+ cells (%) 64.9 63.1 96.2

CD3+ #/spleen (x105) 51.7 216.0 139.6

CD4+/CD45+ cells (%) 40.9 51.7 19.8

CD8+/CD45+ cells (%) 57.2 46.1 78.7

Human CD45+/blood (%) 10.1 21.1 31.0

Spleen and blood samples (n=2) were harvested from NOG-dKO mice at

2, 4, 8 weeks after PBMCs transplantation. Single cell suspensions were

prepared and human CD45 and T, B cell marker positive cells were measured

using a flow cytometry. Each value shows the mean of two mice.
